# Supplementary material for: Metal organic framework derived magnetic porous carbon composite supported gold and palladium nanoparticles as highly efficient and recyclable catalysts for reduction of 4-nitrophenol and hydrodechlorination of 4-chlorophenol
Source: Royal Society of Chemistry journal article supplement (doi:10.1039/c4ta04010d), 2014-01-01
Supplement: c4ta04010d1.pdf [file c4ta04010d1.pdf]

**Metal organic framework derived magnetic porous carbon composites supported  
gold and palladium nanoparticles as highly efficient and recyclable catalysts for  
reduction of 4-nitrophenol and hydrodechlorination of 4-chlorophenol**

Zhengping Dong\*, Xuanduong Le, Yansheng Liu, Chunxu Dong, Jiantai Ma\*

*College of Chemistry and Chemical Engineering, Gansu Provincial Engineering Laboratory for*

*Chemical Catalysis, Lanzhou University, Lanzhou 730000, PR China*

\*Corresponding author.

Tel.: +86 0931 8912577; fax: +86 0931 8912582.

*E-mail address:* [dongzhp@lzu.edu.cn](mailto:dongzhp@lzu.edu.cn) (Zhengping Dong), [majiantai@lzu.edu.cn](mailto:majiantai@lzu.edu.cn) (Jiantai Ma)

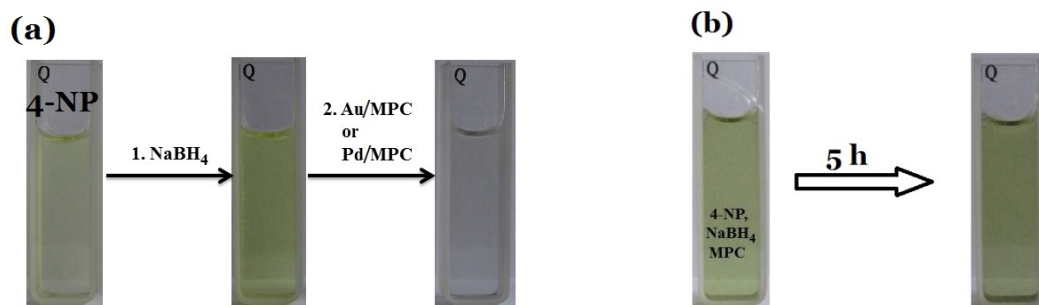

**Figure S1.** (a) The color changes of 4-NP after adding NaBH<sub>4</sub> and Au/MPC or Pd/MPC nanocatalyst. (b) The color changes of 4-NP and NaBH<sub>4</sub> solution after adding MPC and lasted for 5 h.

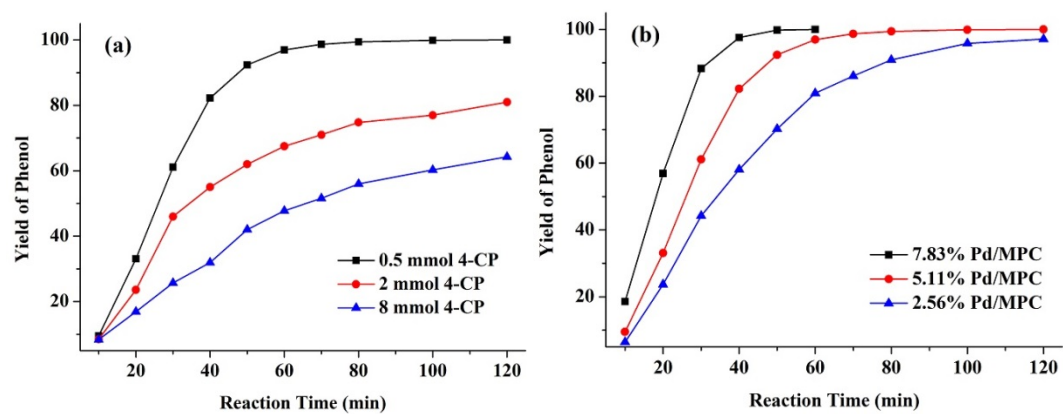

**Figure S2.** (a) Effect of concentration of 4-CP on the conversion of 4-CP by Pd/MPC. Reaction conditions: 10 mg Pd/MPC, 25 °C, 30 mL water, H<sub>2</sub> 30 mL/min, 2 h.

(b) Effect of Pd loading of the Pd/MPC for the HDC of 4-CP. Reaction conditions: 10 mg Pd/MPC, 0.5mmol 4-CP, 25 °C, 30 mL water, H<sub>2</sub> 30 mL/min, 2 h.

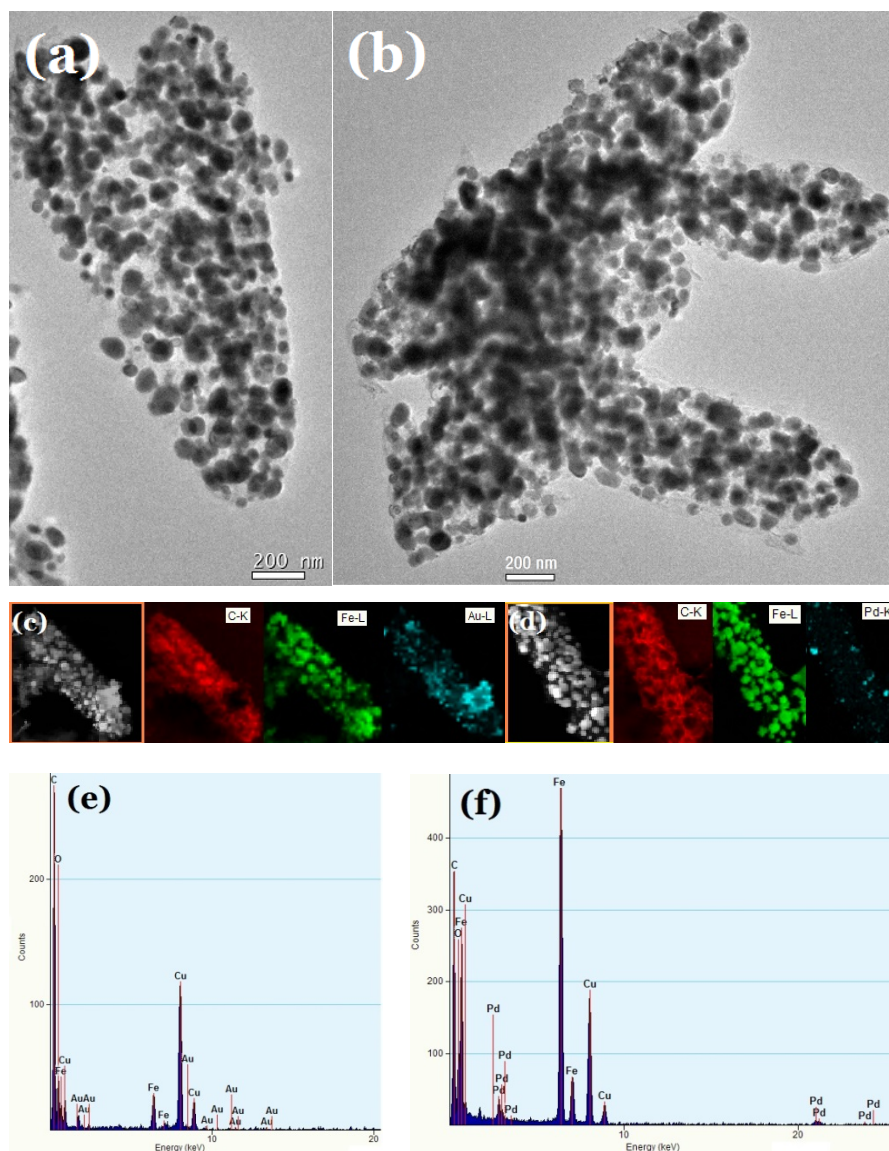

**Figure S3.** The TEM (a) and HAADF-STEM (c) images, EDS spectrum (e) of Au/MPC nanocatalyst used after six cycles. The TEM (b) and HAADF-STEM (d) images, EDS spectrum (f) of Pd/MPC nanocatalyst used after six cycles.
